# Supplementary material for: Dynamical fluxionality, multiplicity of structural forms, and electronic properties of the B3Si11 cluster: anion photoelectron spectroscopy and theoretical calculations
Source: Royal Society of Chemistry journal article supplement (doi:10.1039/c9cp01752f), 2019-01-01
Supplement: c9cp01752f1.pdf [file c9cp01752f1.pdf]

## Electronic Supplementary Information

### Dynamical fluxionality, multiplicity of structural forms, and electronic properties of $B_3Si_{11}$ cluster: anion photoelectron spectroscopy and theoretical calculations

Sheng-Jie Lu<sup>1\*</sup>, Li-Shun Wu<sup>1</sup>, Bao-Hua Yin<sup>1</sup>, Feng Lin<sup>1</sup>, and Ming-Yong Chao<sup>1</sup>

<sup>1</sup>Department of Chemistry and Chemical Engineering, Heze University, Heze, Shandong Province, 274015,  
China

\* Corresponding authors. E-mail: lushengjie@iccas.ac.cn

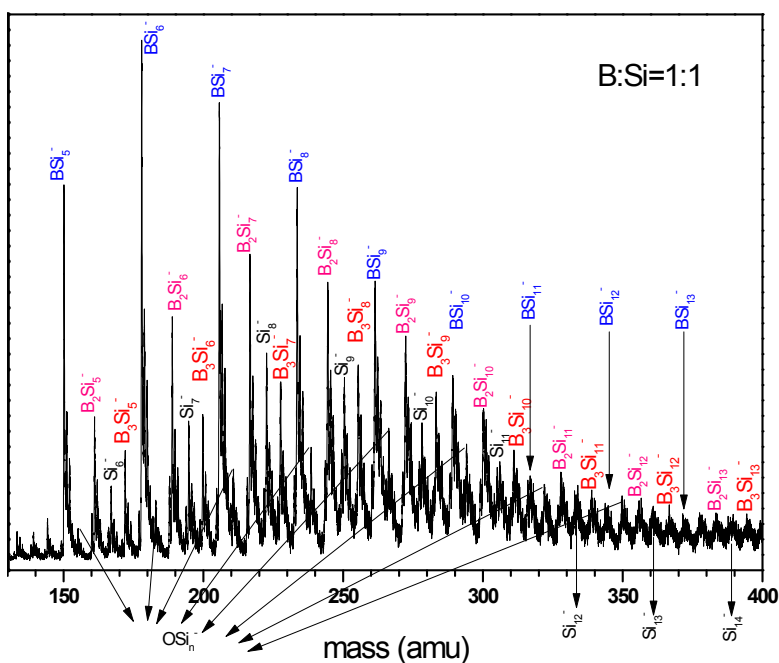

Fig. S1. The typical mass spectrum of  $B_{1-3}Si_n^-$  clusters at the sample mole ratio 1:1.
